# Supplementary material
Source: PubMed Central journal article supplement (PMC3000518)
Supplement: mmc1.pdf [file mmc1.pdf]

Long Route or Short Cut? A Molecular Dynamics  
Study of Traffic of Thiocholine within the  
Active-site Gorge of Acetylcholinesterase

Yechun Xu, Jacques-Philippe Colletier, Martin Weik, Guangrong Qin, Hualiang Jiang, Israel  
Silman, Joel L. Sussman

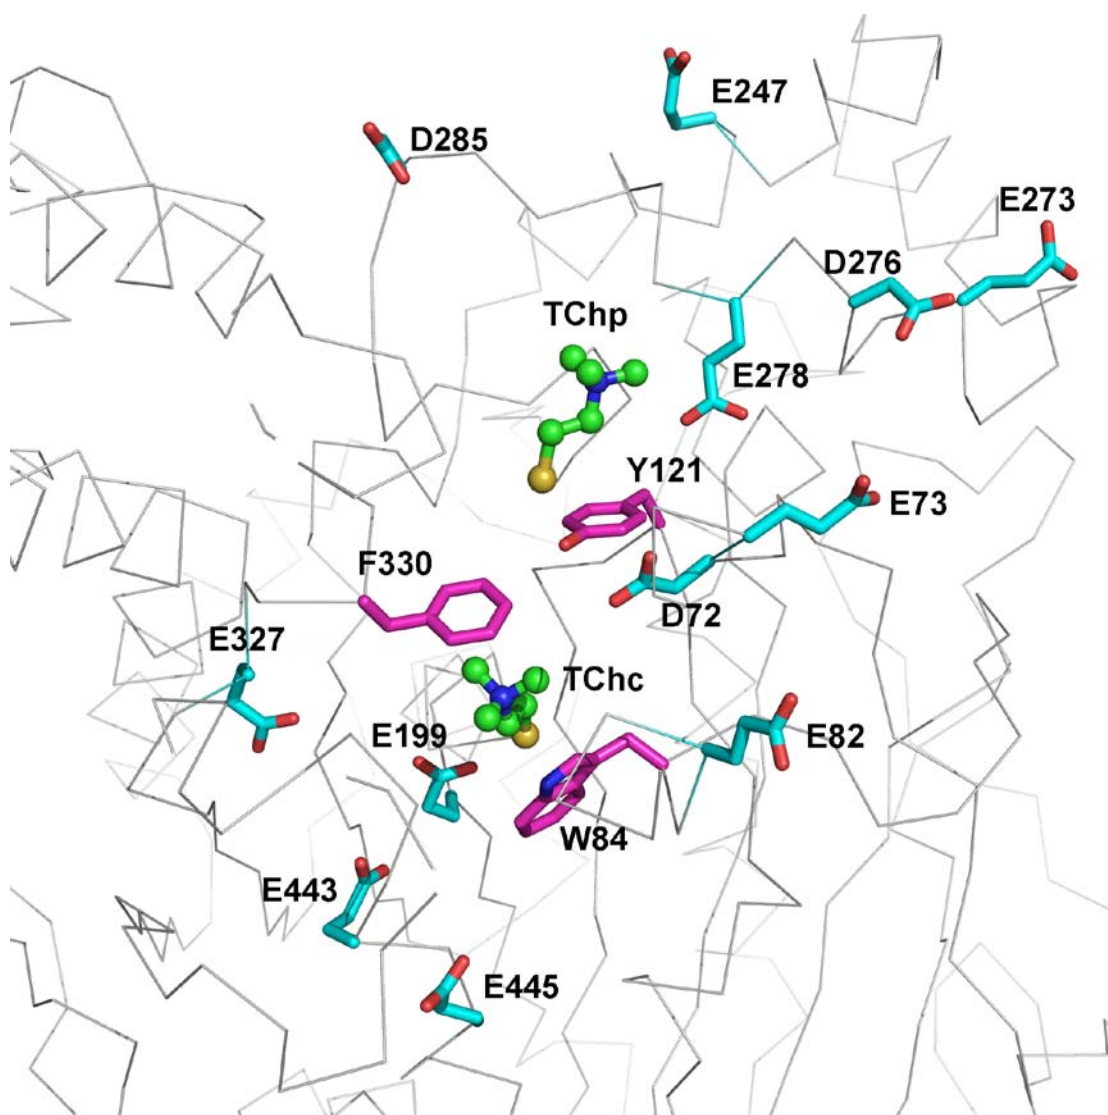

Figure S1 Interactions of TCh<sub>c</sub> and TCh<sub>p</sub> with acidic residues within the active-site gorge. A cross-section through the active-site gorge is displayed, showing acidic

residues as cyan stick models. The bottleneck aromatic residues, Y121 and F330, as well as W84, are shown as magenta sticks. TCh<sub>C</sub> and TCh<sub>P</sub> are displayed as green ball-and-stick models.

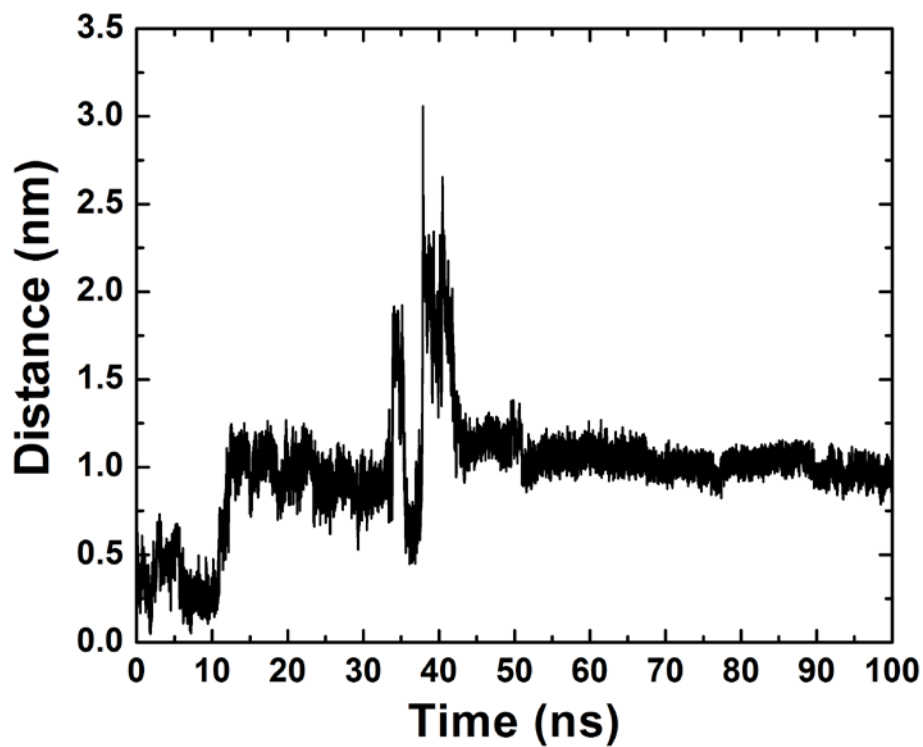

Figure S2 MD trajectory of 'mutated' TCh<sub>P</sub>. In the trajectory shown, in both TCh<sub>P</sub> and TCh<sub>C</sub> the quaternary nitrogen atom has been replaced by a carbon, thus producing uncharged isosteric homologs.
